# Supplementary material for: Candidate Genes Modulating Reproductive Timing in Elite US Soybean Lines Identified in Soybean Alleles of Arabidopsis Flowering Orthologs With Divergent Latitude Distribution
Source: PubMed Central journal article supplement (PMC9100572; doi:10.3389/fpls.2022.889066), 2022-04-29

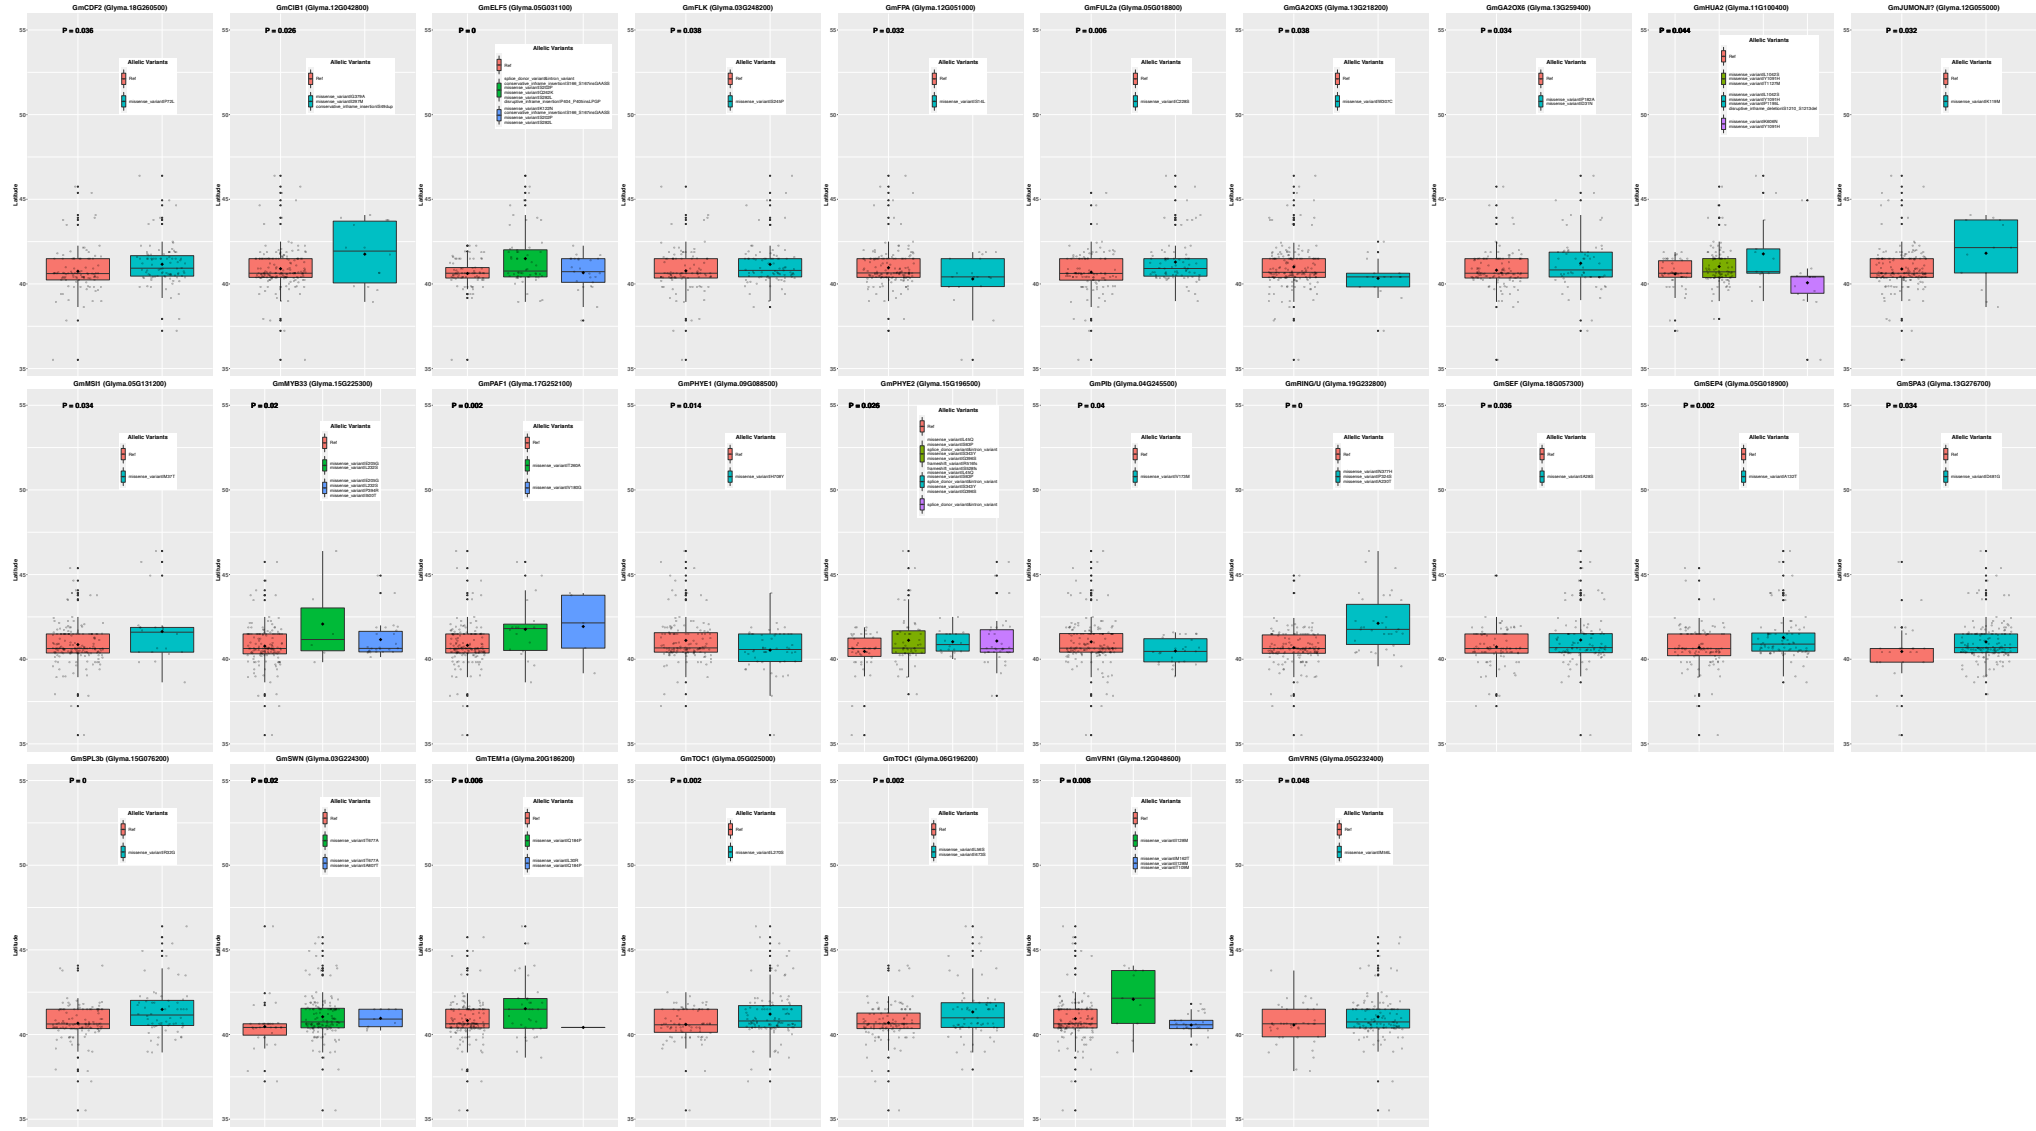

Supplement: Image_2.pdf [file Image_2.pdf]
